# Supplementary material for: Polymeric Infrared and Fluorescent Probes to Assess Macrophage Diversity in Bronchoalveolar Lavage Fluid of Asthma and Other Pulmonary Disease Patients
Source: Preprints.org preprint supplement (doi:10.20944/preprints202410.1765.v1), 2024-10-23
Supplement: Supplementary file 1 [file supplementary]

**Polymeric infrared and fluorescent probes to assess macrophage diversity in bronchoalveolar lavage fluid of asthma and other pulmonary disease patients**

Igor D. Zlotnikov 1 and Elena V. Kudryashova 1,*

1 Faculty of Chemistry, Lomonosov Moscow State University, Leninskie Gory, 1/3, 119991 Moscow, Russia; zlotnikovid@my.msu.ru, nbelog@mail.ru (N.G.B.)

*Correspondence: Helenakoudriachova@yandex.ru (E.V.K.)

**Figure S1.** FTIR spectra of the initial substances and the target IR marker. PBS (0.01 M, pH 7.4). T = 22 °C.





**Figure S2.** Normalized on Amide I peakFTIR spectra of BALF samples (from a patient with purulent endobronchitis) during real-time incubation with marker IR1. The volume of the reaction mixture is 35 µl. The number of cells from BALF is about 2×105. The concentration of the IR marker is 5 mg/mL by PEG (equivalent to 1 mM). PBS (0.01M, pH 7.4). T = 37 °C.


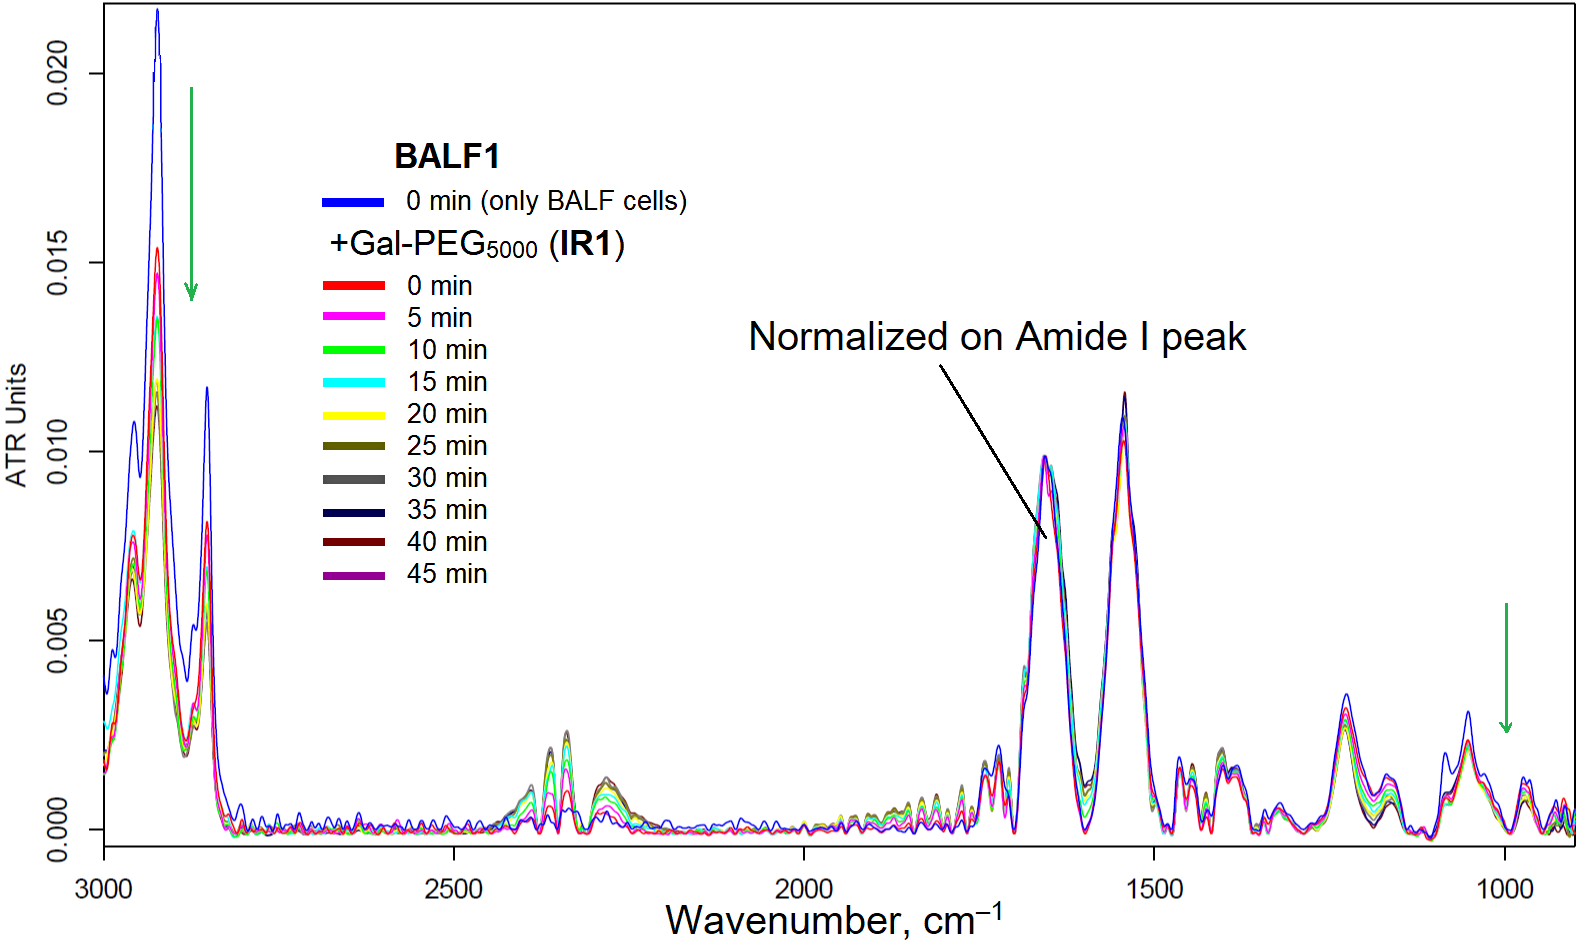


**Figure S3.** **(a)** FTIR microscopic maps of the peak intensities integral distribution in the IR spectra of BALF samples (diagnosed with purulent endobronchitis) incubated for 1h with different IR markers (10 mg/ml). **(b)** FTIR microscopic maps of the peak intensities integral distribution in the IR spectra of BALF samples (diagnosed with purulent endobronchitis) incubated for 1h with different IR markers (10 mg/ml) followed by mannan treatment (10 mg/ml) for 1 h. PBS (0.01M, pH 7.4). T = 37 °C.

**(a)**

**(b)**

**Figure S4.** **(a)** FTIR microscopic maps of the peak intensities integral distribution in the IR spectra of BALF samples (from a patient with bronchial asthma (with plastic bronchitis)) incubated for 1h with different IR markers (10 mg/ml). **(b)** FTIR microscopic maps of the peak intensities integral distribution in the IR spectra of BALF samples (diagnosed with purulent endobronchitis) incubated for 1h with different IR markers (10 mg/ml) followed by mannan treatment (10 mg/ml) for 1 h. PBS (0.01M, pH 7.4). T = 37 °C.

**(a)**

**(b)**

**Figure S5.** CLSM images of (a) THP-1-derived macrophage-like cells and (b) human dermal fibroblasts (HDF). Phagocytosis assay with PEI-triMan-FITC and PEI-Man-FITC after incubation for 40 min (green channel). Phase contrast microscopy, fluorescent microscopy, blue channel—nuclei stained with DAPI, red channel – CD206 receptors were stained with Alexa594. Scale bar, 100 μm.


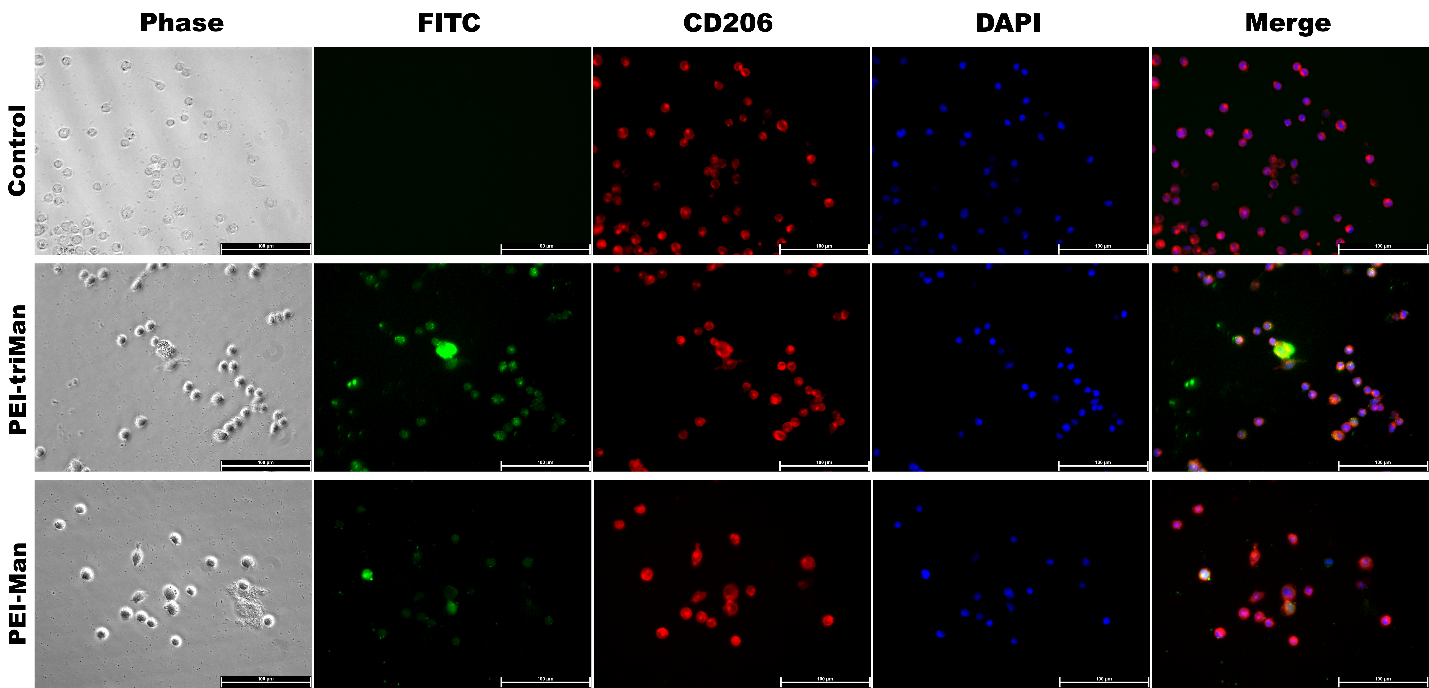


**(a)**


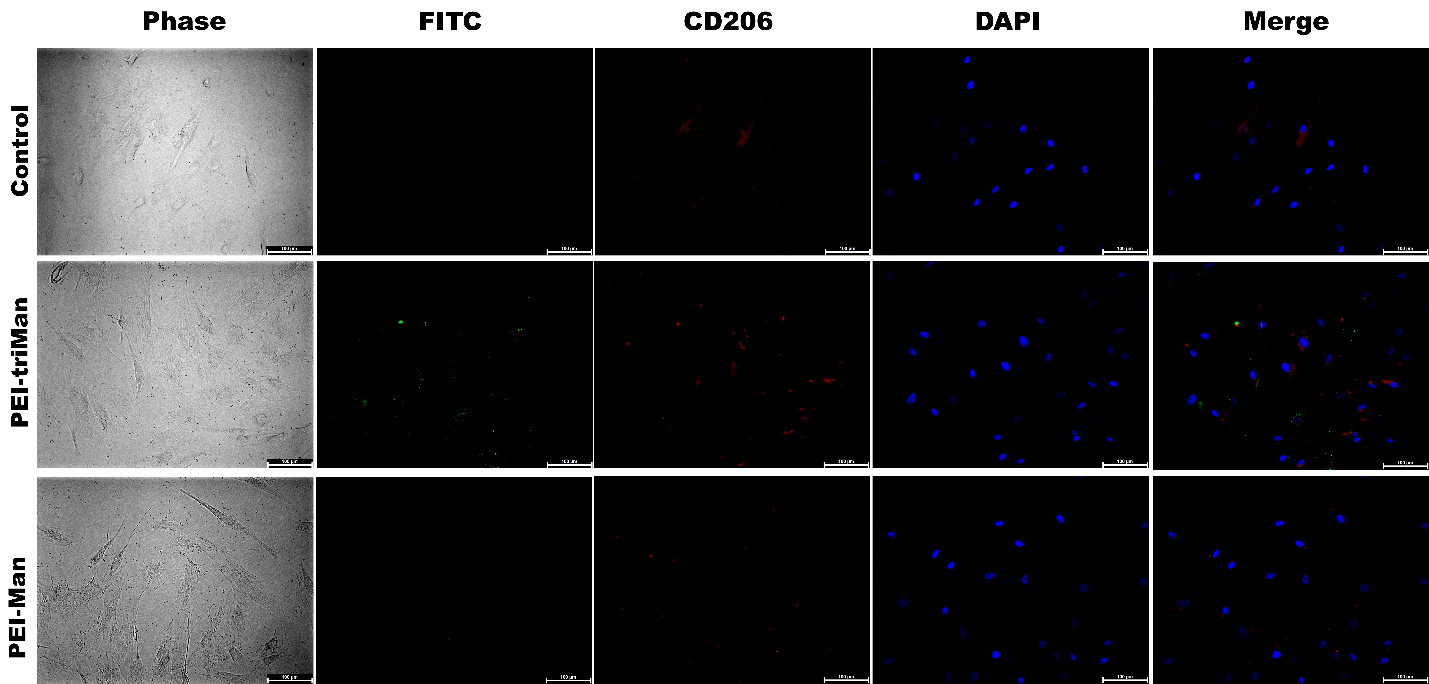


**(b)**
